# Supplementary material for: DNA methylation signatures of chronic low-grade inflammation are associated with complex diseases
Source: Genome Biol. 2016 Dec 12;17:255. doi: 10.1186/s13059-016-1119-5 (PMC5151130; doi:10.1186/s13059-016-1119-5)
Supplement: Additional file 5: Table S5. — Meta-analysis results including all European and African-American whole blood studies. (XLSX 25 kb) [file 13059_2016_1119_MOESM5_ESM.xlsx]

## Sheet: SupplementaryTable429092016
MarkerName	Chr	Position	Effect	P value	Gene
cg00159243	12	109023799	-0.0028	3.44e-10	SELPLG
cg00227093	5	149979838	-0.0027	6.08e-08	SYNPO
cg00309945	1	22148926	0.003	5.46e-10	LDLRAD2
cg00490406	1	159046773	-0.006	3.06e-14	AIM2
cg00711496	19	50191497	-0.0042	9.95e-09	C19orf76
cg00812761	4	53799391	0.0027	2.6e-10	SCFD2
cg00851028	1	234905772	0.0026	4.38e-11
cg01015663	1	23729692	-0.0029	1.59e-08	TCEA3
cg01059398	3	172235808	-0.0045	5.56e-15	TNFSF10
cg01101459	1	234871477	0.0035	1.63e-13
cg01127300	22	38614796	-0.0043	3.26e-09
cg01242348	14	23586886	0.0016	1.11e-08	CEBPE
cg01243312	2	136422981	0.0039	5.89e-10	MIR128-1
cg01243823	16	50732212	-0.0037	1.45e-09	NOD2
cg01332882	20	47874155	0.0033	3.09e-09	ZNFX1
cg01409343	17	57915740	-0.0045	3.21e-14	TMEM49
cg01418351	4	1294432	0.0021	5.82e-09	MAEA
cg01445100	16	88103339	0.0021	4.22e-09	BANP
cg01538969	6	30624636	0.0025	4.8e-08	DHX16
cg01588592	1	157069325	0.0021	8.36e-08	ETV3L
cg01671681	3	155421735	-0.003	1.01e-07	PLCH1
cg01799015	19	707791	-0.0025	4.39e-08	PALM
cg01833890	12	2564063	0.0019	3.19e-09	CACNA1C
cg02003183	14	103415882	0.0048	2.05e-14	CDC42BPB
cg02068690	2	25600451	0.0019	6.96e-08	DTNB
cg02203067	16	87866800	0.0024	1.08e-07	SLC7A5
cg02212836	6	6589075	0.002	7.15e-08	LY86
cg02341197	21	34185927	0.0033	4.14e-10	C21orf62
cg02448796	1	6101339	0.0032	3.18e-09	KCNAB2
cg02481950	16	21665002	0.0024	6.96e-14	METTL9
cg02538248	16	75045643	-0.0036	5.09e-08	ZNRF1
cg02650017	17	47301614	-0.0017	2.59e-23	PHOSPHO1
cg02711608	19	47287964	-0.0033	7.4e-15	SLC1A5
cg02716826	9	33447032	-0.0038	7.77e-15	SUGT1P1
cg02734358	4	90227074	-0.0049	4.47e-16	GPRIN3
cg02787737	11	133928346	0.0031	1.08e-07
cg02909097	17	2843206	0.0024	2.78e-08	RAP1GAP2
cg02976843	17	2843257	0.0027	2.52e-09	RAP1GAP2
cg03055671	3	172231528	-0.0042	8.36e-08	TNFSF10
cg03068497	7	30635838	-0.0064	1.98e-10	GARS
cg03128029	2	203143288	-0.0029	8.94e-10	NOP58
cg03290827	17	75180760	0.0025	8.5e-08	SEC14L1
cg03497652	16	4751569	0.0033	7.1e-08	ANKS3
cg03650189	19	10405083	0.0049	4.84e-08	ICAM5
cg03699074	16	88849875	-0.0024	1.41e-08	FAM38A
cg03725309	1	109757585	-0.0023	1.52e-10	SARS
cg03940776	6	158490013	-0.0018	7.98e-08	SYNJ2
cg03957124	6	37016869	-0.0031	6.72e-14
cg03963853	16	4732369	0.0022	1.27e-09	MGRN1
cg03998636	13	111210121	-0.0023	2.68e-08	RAB20
cg04202511	16	68117991	0.0025	3.83e-09	NFATC3
cg04255937	12	122269675	0.0025	8.45e-10	SETD1B
cg04321224	21	46341380	0.0027	1.88e-08	ITGB2
cg04389058	3	57041402	-0.0031	8.16e-09	ARHGEF3
cg04465154	8	9045558	-0.0032	1.91e-08
cg04508739	14	57263369	0.0028	7.81e-08
cg04523589	3	48265146	0.0024	5.24e-11	CAMP
cg04987734	14	103415873	0.0043	8.66e-13	CDC42BPB
cg05168229	13	45390049	-0.0021	3.39e-08
cg05248321	14	20898128	0.0032	1.1e-11	KLHL33
cg05279866	8	37378355	0.003	4.2e-13
cg05316065	8	130799007	-0.0031	3.26e-12	GSDMC
cg05399785	1	3564031	0.0028	4.36e-11	WDR8
cg05400196	6	42272048	0.002	5.26e-09	TRERF1
cg05575921	5	373378	-0.006	3.05e-12	AHRR
cg05673882	5	74862702	-0.0037	2.32e-08	POLK
cg05897122	4	53112707	-0.0035	1.99e-08
cg06017212	17	1478463	0.0019	3.82e-08	SLC43A2
cg06092244	2	48796151	-0.0025	1.46e-08	STON1-GTF2A1L
cg06126421	6	30720080	-0.0054	7.42e-11
cg06164260	3	187454439	-0.002	1.98e-09	BCL6
cg06192883	15	52554171	0.005	3.73e-24	MYO5C
cg06291107	20	36157675	0.0019	6.59e-08	BLCAP
cg06484123	19	53107200	0.0048	3.5e-08
cg06647068	12	104853274	-0.0033	1.9e-08	CHST11
cg06690548	4	139162808	-0.0037	5.96e-16	SLC7A11
cg06946797	16	11422409	-0.003	4.07e-08
cg07021906	16	87866833	0.0032	8.7e-10	SLC7A5
cg07037944	15	64290807	-0.0024	4.79e-10	DAPK2
cg07069636	16	30671749	-0.0022	9.03e-08
cg07078732	2	30505165	0.0024	5.88e-12
cg07094298	4	2748026	-0.0056	9.51e-17	TNIP2
cg07248377	16	4732406	0.003	3.07e-08	MGRN1
cg07573872	19	1126342	-0.0055	8.06e-24	SBNO2
cg07626482	19	47289503	-0.0027	1.18e-10	SLC1A5
cg07793033	16	85256423	0.0028	2.82e-08
cg07960624	8	119208486	-0.004	4.63e-08	SAMD12
cg08255481	16	88103035	0.0024	2.61e-09	BANP
cg08289839	13	111318640	0.0026	4.2e-10	CARS2
cg08352115	17	66356057	0.0026	3.65e-09	ARSG
cg08362785	22	40814878	0.0019	2.89e-08	MKL1
cg08423142	15	59588622	-0.0017	1.73e-09	MYO1E
cg08507178	22	50357265	-0.0021	4.9e-09	PIM3
cg08548559	22	31686097	-0.004	3.94e-11	PIK3IP1
cg08645860	16	85969301	0.0028	6.02e-09
cg09007354	1	54100163	0.0023	1.23e-08	GLIS1
cg09018739	16	57180107	0.0035	1.82e-15	CPNE2
cg09182678	22	50328711	-0.0017	1.78e-09
cg09421562	17	56357994	-0.0024	1.02e-08	MPO
cg09476997	16	2087932	0.0022	9.17e-08	SLC9A3R2
cg09481056	16	2339260	0.0028	3.08e-12	ABCA3
cg09610644	3	197249274	0.0032	3.69e-09	BDH1
cg09876440	3	10325981	-0.0045	5.28e-09	GHRLOS
cg09940677	14	103415458	0.0019	3.38e-08	CDC42BPB
cg10241823	17	841205	0.0034	1.24e-10	NXN
cg10345404	8	27187123	0.0016	3.09e-08	PTK2B
cg10409253	7	5692709	0.0021	7.13e-08	RNF216
cg10472711	7	797592	-0.0029	2.57e-08	HEATR2
cg10508317	17	76355146	-0.002	9.38e-10	SOCS3
cg10636246	1	159046973	-0.0071	2.34e-29	AIM2
cg10919522	14	74227441	-0.0035	1.27e-12	C14orf43
cg10922280	16	68034227	0.0022	1.44e-09	DPEP2
cg11024682	17	17730094	0.0031	2.77e-13	SREBF1
cg11032810	4	141057042	-0.0017	1.1e-07	MAML3
cg11064521	15	69606134	0.0018	8.63e-09	PAQR5
cg11183227	15	91455407	0.0028	4.22e-10	MAN2A2
cg11376147	11	57261198	-0.0017	9.45e-11	SLC43A1
cg11832534	1	3563998	0.0022	1.14e-10	WDR8
cg11849692	10	103875969	0.0019	2.6e-08	LDB1
cg12053291	12	125282342	0.0031	5.41e-13	SCARB1
cg12054453	17	57915717	-0.009	3.14e-25	TMEM49
cg12269535	6	43142014	-0.0031	2.28e-09	SRF
cg12298872	1	228352449	0.0027	9.09e-09	C1orf69
cg12315466	2	233923814	0.0019	2.36e-08	INPP5D
cg12458003	1	204960826	0.0023	8.07e-08	NFASC
cg12535090	11	20071677	0.0022	1.71e-08	NAV2
cg12555233	15	91455366	0.002	2.49e-11	MAN2A2
cg12620005	1	51779655	-0.0016	1.04e-07	TTC39A
cg12644285	15	93570953	-0.003	5.06e-08	CHD2
cg12728588	1	36025489	0.0018	2.37e-10	NCDN
cg12955084	19	41886265	0.0024	6.33e-08	TMEM91
cg12992827	3	101901234	-0.0063	3.81e-28
cg13033858	12	109248326	-0.0036	3.49e-10	SSH1
cg13059136	11	2986541	0.0032	1.85e-09	SNORA54
cg13165240	17	3715743	0.0036	8.9e-14	C17orf85
cg13274938	17	38493822	0.002	6.75e-08	RARA
cg13300580	1	27440539	0.0023	7.75e-12	SLC9A1
cg13328614	X	48775123	-0.0038	1.3e-08	PIM2
cg13585930	10	72027357	-0.0038	1.29e-13	NPFFR1
cg13781414	9	138951648	-0.0022	1.07e-08	NACC2
cg14237301	16	28506477	0.0038	5.28e-10	APOB48R
cg14476101	1	120255992	-0.0068	4.44e-16	PHGDH
cg14753356	6	30720108	-0.0032	7.6e-10
cg14849578	12	125282480	0.0034	3.69e-12	SCARB1
cg15011409	19	10405226	0.0049	5.36e-08	ICAM5
cg15020801	17	46022809	0.0026	4.32e-10	PNPO
cg15114651	19	47289410	-0.0024	9.69e-11	SLC1A5
cg15310871	8	20077936	0.0023	8.42e-11	ATP6V1B2
cg15342087	6	30720209	-0.002	3.51e-09
cg15357118	2	128927972	0.0034	1.16e-12	UGGT1
cg15551881	9	123688715	0.0042	3.44e-14	TRAF1
cg15721584	3	181326755	0.0059	1.16e-11	SOX2OT
cg15809077	2	112462079	-0.0012	4.41e-08
cg15901722	5	175974973	-0.0033	1.53e-12	PCDH24
cg16097041	1	154965544	0.0022	2.07e-08	FLAD1
cg16246545	1	120255941	-0.0041	7.52e-10	PHGDH
cg16292768	8	27467783	-0.0028	1.61e-08	CLU
cg16305292	8	142219965	0.0026	6.26e-10
cg16536330	8	29957344	-0.0012	2.08e-08	LEPROTL1
cg16734549	17	43488551	0.0021	8.38e-08	ARHGAP27
cg16739178	16	85470674	0.0023	1.06e-07
cg16755922	17	80536214	0.0035	5.69e-09	FOXK2
cg16936953	17	57915665	-0.0086	4.85e-27	TMEM49
cg17178175	2	178109973	-0.0037	1.39e-11	NFE2L2
cg17237086	22	40814966	0.0022	4.69e-09	MKL1
cg17260706	11	118782879	-0.002	2.48e-08	BCL9L
cg17501210	6	166970252	-0.0066	3.03e-25	RPS6KA2
cg17515347	1	159047163	-0.0054	1.28e-08	AIM2
cg17572056	3	195947062	0.0023	1.09e-07	OSTalpha
cg17907003	1	117533414	-0.0028	2.44e-08
cg17980786	3	32933637	0.0032	3.61e-13	TRIM71
cg18062721	3	11643427	0.0041	6.24e-09	VGLL4
cg18120259	6	43894639	-0.0026	1.19e-08	LOC100132354
cg18125510	14	100841768	-0.0031	2.13e-12	WARS
cg18181703	17	76354621	-0.006	6.74e-24	SOCS3
cg18217136	20	36157651	0.002	1.54e-10	BLCAP
cg18330338	5	9047211	0.0025	4.53e-08	SEMA5A
cg18476766	2	240529742	0.0031	5.64e-08
cg18513344	3	195531298	-0.002	7.38e-09	MUC4
cg18608055	19	1130866	-0.0048	2.33e-23	SBNO2
cg18663307	21	46341389	0.0033	2.5e-09	ITGB2
cg18860310	4	87752504	-0.0031	2.32e-10	SLC10A6
cg18942579	17	57915773	-0.0064	4.04e-21	TMEM49
cg18995788	8	62673444	-0.002	5.06e-08
cg19137806	10	134362170	0.0027	4.08e-08	INPP5A
cg19588519	10	125817817	0.0028	1.32e-11
cg19695507	10	13526193	0.0029	8.36e-08	BEND7
cg19769147	14	105860954	0.0029	2.8e-16	PACS2
cg19821297	19	12890029	-0.0052	1.14e-21
cg20045320	11	319555	-0.005	1.19e-08
cg20451986	11	133928302	0.0035	1.36e-09
cg20671910	1	151262619	0.0024	9.72e-10	ZNF687
cg20697417	1	41786797	0.0025	1.19e-08
cg20995564	2	145172035	-0.0058	1.56e-19	ZEB2
cg21106695	14	97370064	0.003	7.92e-08
cg21190595	11	3071167	-0.0021	5.72e-08	CARS
cg21429551	7	30635762	-0.0072	3.95e-12	GARS
cg21766592	19	47288066	-0.002	2.37e-09	SLC1A5
cg21990700	12	7260776	-0.0028	6.07e-08	LOC283314
cg22069247	2	232393256	0.0025	1.15e-07	NMUR1
cg22103219	7	101934892	-0.0034	4.27e-10	SH2B2
cg22304262	19	47287778	-0.0043	2.32e-15	SLC1A5
cg22448090	1	200978598	0.002	6.63e-10	KIF21B
cg22488164	12	14716910	0.0025	7.35e-08	PLBD1
cg22690339	6	38249061	0.0038	8.49e-09	BTBD9
cg22749855	17	76353952	-0.0026	5.99e-10	SOCS3
cg22908922	14	105855008	0.0024	2.63e-10	PACS2
cg22959742	10	13913931	0.0039	6.38e-12	FRMD4A
cg23172671	1	203482523	0.0036	1.32e-08
cg23570810	11	315102	-0.004	6.25e-08	IFITM1
cg23759710	2	42990957	0.002	4.81e-11	OXER1
cg23761815	10	73083123	0.0024	2.7e-11	SLC29A3
cg23801885	6	34458902	0.0019	7.64e-08	PACSIN1
cg23842572	17	17030253	0.0031	8.24e-15	MPRIP
cg23866916	19	1155738	-0.0018	7.24e-08	SBNO2
cg23886355	13	113662042	0.0025	4.68e-10	MCF2L
cg23966214	17	48203188	-0.0018	1.57e-08	SAMD14
cg24002003	15	101668143	-0.0025	6.81e-09
cg24174557	17	57903544	-0.004	1.08e-10	TMEM49
cg24259291	20	47874072	0.0019	1.18e-08	ZNFX1
cg24296397	3	49692537	0.0025	2.48e-08	BSN
cg24405567	15	70787565	-0.0031	3.79e-08
cg24678869	1	153919638	0.0017	9.05e-08	DENND4B
cg24707889	21	46341304	0.0034	2.23e-10	ITGB2
cg24859433	6	30720203	-0.0019	8.2e-08
cg24925163	2	128458248	0.0022	1.01e-09	SFT2D3
cg25114611	6	35696870	-0.0021	7.81e-08	FKBP5
cg25130381	1	27440721	0.002	3.14e-08	SLC9A1
cg25132241	14	92396859	0.0025	2.02e-12	FBLN5
cg25217710	1	156609523	0.0026	4.55e-13
cg25325512	6	37142220	-0.0034	1.8e-10	PIM1
cg25368647	5	176736591	-0.0035	2.51e-08	MXD3
cg25392060	8	142297121	0.0027	2.45e-09
cg25580581	10	3853668	-0.0031	2.37e-08
cg25653947	8	144443217	0.0021	2.29e-09
cg25739715	22	30663881	-0.0012	1.84e-08	OSM
cg25754958	1	202130692	-0.003	2.95e-08	PTPN7
cg25921813	3	194797138	0.0019	6.62e-08	C3orf21
cg26227957	1	19547285	0.0033	1.07e-13	KIAA0090
cg26250129	17	79239903	0.0022	1.12e-08	SLC38A10
cg26470501	19	45252955	-0.0046	5.4e-22	BCL3
cg26581729	9	139939792	-0.0031	5.82e-09	NPDC1
cg26599989	11	1297087	0.0026	4.64e-09	TOLLIP
cg26610247	8	142297175	0.0031	4.82e-12
cg26663590	16	28959310	0.003	5.55e-08
cg26680989	16	85560739	0.0023	3.66e-08
cg26804423	7	8201134	0.0029	1.02e-15	ICA1
cg26846781	17	61620942	0.002	1.84e-10	KCNH6
cg26955383	10	105218660	0.0029	1.37e-10	CALHM1
cg27023597	17	57918262	-0.0054	4.37e-13	MIR21
cg27050612	17	46133198	-0.002	6.48e-11	NFE2L1
cg27115863	22	37921640	-0.003	1.69e-09
cg27184903	15	29285727	0.0028	1.57e-10	APBA2
cg27269962	7	127540997	0.0019	9.44e-08	SND1
cg27307975	15	58797839	-0.002	4.96e-10	LIPC
cg27469606	19	1154485	-0.0021	1.23e-13	SBNO2
cg27516100	6	30624520	0.0019	1.53e-08	DHX16
cg27637521	17	76355202	-0.0016	5.95e-11	SOCS3
