# Supplementary material for: DNA methylation signatures of chronic low-grade inflammation are associated with complex diseases
Source: Genome Biol. 2016 Dec 12;17:255. doi: 10.1186/s13059-016-1119-5 (PMC5151130; doi:10.1186/s13059-016-1119-5)
Supplement: Additional file 9: Table S8. — Significant methylation-expression results and corresponding expression-CRP results for the replicated CpGs. (XLSX 11 kb) [file 13059_2016_1119_MOESM9_ESM.xlsx]

## Sheet: eQTMresultsFHS_KORA_RS_Pmethod_
	Methylation-expression		Expression-CRP levels
MarkerName	Zscore	P value	Z-score	P value	Gene
cg10636246	-12.368	3.892e-35	11.01	3.4e-28	AIM2
cg19821297	-4.385	1.161e-05	1.48	0.14	DNASE2
cg25325512	-4.297	1.733e-05	-0.292	0.77	FGD2
cg27023597	-4.08	4.51e-05	1.89	0.06	HEATR6
cg06126421	-3.98	6.901e-05	-1.39	0.16	IER3
cg10636246	-6.904	5.071e-12	6.47	9.9e-11	IFI16
cg06690548	-6.963	3.338e-12	4.9	9.8e-07	SLC7A11
cg18181703	-4.949	7.47e-07	3.74	0.00018	SOCS3
cg06126421	-5.122	3.017e-07	-0.98	0.33	TUBB
