# Supplementary material for: DNA methylation signatures of chronic low-grade inflammation are associated with complex diseases
Source: Genome Biol. 2016 Dec 12;17:255. doi: 10.1186/s13059-016-1119-5 (PMC5151130; doi:10.1186/s13059-016-1119-5)
Supplement: Additional file 10: Table S9. — Significant associations between DNA methylation and corresponding nearby genetic variants and between the genetic variant and CRP in the largest published GWAS of CRP (n = 66,185). (XLSX 12 kb) [file 13059_2016_1119_MOESM10_ESM.xlsx]

## Sheet: mQTL_RS_replicatedFHS_28092016
						Discovery		Replication			C-reactive protein GWAS
SNP	Chr	SNP Position	Al1	CpG	CpG Position	Correlation	P value	Effect	P value	R2	Effect	P value
rs10089884	8	130788955	C	cg05316065	130799007	0.15	3.3e-05	0.00359552	1.55329e-06	0.00980054	-0.0117	0.2066
rs11667764	19	12889224	A	cg19821297	12890029	0.28	5e-15	0.0298295	1.18155e-31	0.0567998	0.0176	0.1305
rs11943964	4	53863203	C	cg00812761	53799391	-0.12	0.00095	-0.00376203	3.00111e-12	0.0205614	0.0119	0.179
rs12526186	6	30736151	T	cg06126421	30720080	0.32	9.4e-19	0.0233501	6.3369e-92	0.161756	0.0064	0.4553
rs12677618	8	142302024	T	cg25392060	142297121	-0.41	3.2e-30	-0.011443	2.72718e-126	0.216387	0.0045	0.5327
rs12677618	8	142302024	T	cg26610247	142297175	-0.41	1.8e-31	-0.0135987	1.63265e-122	0.210559	0.0045	0.5327
rs226005	16	21620547	A	cg02481950	21665002	-0.2	6.8e-08	-0.00545685	4.79648e-41	0.0739406	-0.0119	0.09082
rs2341303	4	2747475	G	cg07094298	2748026	0.31	1.2e-17	0.00841034	1.68797e-54	0.09799	0.0032	0.62
rs2391870	7	30541032	G	cg21429551	30635762	0.16	2.3e-05	0.00415903	2.69973e-05	0.00748977	0.0004	0.9574
rs7809298	7	8215208	C	cg26804423	8201134	0.16	1.2e-05	0.00708919	4.40746e-18	0.0315504	0.0009	0.9204
