# Supplementary material for: DNA methylation signatures of chronic low-grade inflammation are associated with complex diseases
Source: Springer Nature journal article supplement (doi:10.1186/s13059-016-1119-5), 2016-12-01
Supplement: MOESM1 [file 13059_2016_1119_MOESM1_ESM.pdf]

**Supplementary Table 1. Clinical Characteristics of the individuals in the discovery and replication studies.**

|                            | N    | Female (%) | Age (years) | CRP (mg/L) | BMI (kg/m <sup>2</sup> ) | SBP (mmHg) | TC (mmol/L) | FG (mmol/L) | Diabetes (%) | CHD (%) | Smoking (%) | HTN (%) | Lipid Rx (%) |
|----------------------------|------|------------|-------------|------------|--------------------------|------------|-------------|-------------|--------------|---------|-------------|---------|--------------|
| <i>Discovery cohorts</i>   |      |            |             |            |                          |            |             |             |              |         |             |         |              |
| CHS (EA)                   | 187  | 56         | 76 (5)      | 6.6 (11.0) | 27 (5)                   | 136 (22)   | 5.3 (1.1)   | 5.9 (1.5)   | 12           | 3       | 13          | 42      | 5            |
| EPIC                       | 1287 | 51         | 60 (9)      | 3.3 (5.4)  | 27 (4)                   | NA         | NA          | NA          | NA           | NA      | 27          | NA      | NA           |
| FHS                        | 2427 | 52         | 66 (9)      | 3.1 (6.7)  | 28 (5)                   | 129 (17)   | 4.8 (1.0)   | 5.9 (1.3)   | 14           | 7       | 11          | 55      | 44           |
| GOLDN                      | 976  | 52         | 49 (16)     | 2.4 (4.4)  | 28 (6)                   | 116 (17)   | 2.0 (0.9)   | 5.6 (0.9)   | 8            | 0       | 7           | 35      | 0            |
| InCHIANTI                  | 498  | 55         | 63 (16)     | 3.2 (3.5)  | 27 (4)                   | 141 (21)   | 5.6 (1.0)   | 5.1 (1.2)   | 8            | 7       | 19          | 58      | 9            |
| KORA                       | 1700 | 51         | 61 (9)      | 2.3 (3.7)  | 28 (5)                   | 125 (19)   | 5.7 (1.0)   | 5.6 (1.1)   | 9            | 3       | 14          | 37      | 16           |
| LBC 1921                   | 169  | 54         | 87 (0)      | 3.7 (8.4)  | 26 (4)                   | 168 (25)   | NA          | NA          | 6            | NA      | 3           | 47      | NA           |
| LBC 1936                   | 296  | 50         | 70 (1)      | 5.3 (6.8)  | 28 (4)                   | 149 (19)   | 5.4 (1.2)   | NA          | 8            | NA      | 11          | 41      | NA           |
| NAS                        | 648  | 0          | 73 (7)      | 3.3 (6.1)  | 28 (4)                   | 131 (17)   | 5.0 (1.0)   | 6.0 (1.5)   | 19           | 19      | 4           | 71      | 38           |
| RS                         | 702  | 54         | 60 (8)      | 2.7 (4.7)  | 28 (5)                   | 134 (14)   | 5.5 (1.1)   | 5.6 (1.2)   | 10           | 6       | 27          | 62      | 27           |
| WHI EA*                    | 478  | 100        | 69 (6)      | 4.9 (6.4)  | 29 (6)                   | 129 (19)   | 6.2 (1.0)   | 6.1 (2.1)   | 14           | 100     | 1.5         | 48      | 11           |
| WHI EA†                    | 471  | 100        | 68 (6)      | 3.8 (5.5)  | 28 (6)                   | 126 (17)   | 6.0 (1.0)   | 5.5 (1.3)   | 4            | 0       | 0.6         | 27      | 8            |
| <i>Replication cohorts</i> |      |            |             |            |                          |            |             |             |              |         |             |         |              |
| ARIC                       | 2264 | 64         | 56 (6)      | 5.9 (7.8)  | 30 (6)                   | 126 (20)   | 5.4 (1.1)   | 7.2 (3.6)   | 25           | 4       | 25          | 55      | 4            |
| CHS (AA)                   | 193  | 65         | 73 (5)      | 5.2 (5.6)  | 29 (5)                   | 142 (21)   | 5.5 (0.9)   | 6.6 (2.7)   | 24           | 1       | 15          | 59      | 4            |
| GENOA                      | 939  | 71         | 66 (8)      | 6.7 (12.3) | 31 (6)                   | 140 (21)   | 5.3 (1.1)   | 6.2 (2.3)   | 31           | 7       | 13          | 82      | 21           |
| GTP                        | 112  | 70         | 41 (13)     | 5.9 (8.1)  | 33 (8)                   | NA         | NA          | NA          | NA           | NA      | NA          | NA      | NA           |
| WHI AA*                    | 294  | 100        | 64 (7)      | 7.2 (8.4)  | 32 (6)                   | 133 (19)   | 6.1 (1.3)   | 6.9 (3.3)   | 27           | 100     | 3.1         | 64      | 13           |
| WHI AA†                    | 309  | 100        | 62 (6)      | 6.1 (7.5)  | 31 (7)                   | 129 (17)   | 5.8 (1.1)   | 5.8 (2.0)   | 10           | 0       | 0.3         | 52      | 6            |
