# Supplementary material for: DNA methylation signatures of chronic low-grade inflammation are associated with complex diseases
Source: Springer Nature journal article supplement (doi:10.1186/s13059-016-1119-5), 2016-12-01
Supplement: MOESM11 [file 13059_2016_1119_MOESM11_ESM.pdf]

**Supplementary Table 9. Genome-wide association studies enrichment analysis.**

| <b>Disease</b>                                            | <b>N genes in GWAS</b> | <b>N genes in EWAS</b> | <b>Enrichment P-value</b> | <b>Gene</b>      |
|-----------------------------------------------------------|------------------------|------------------------|---------------------------|------------------|
| Epilepsy (generalized)                                    | 9                      | 3                      | 6,00E-07                  | NFE2L1;PNPO;ZEB2 |
| Renal cell carcinoma                                      | 7                      | 2                      | 7,97E-05                  | SCARB1;ZEB2      |
| Lipoprotein-associated phospholipase A2 activity and mass | 13                     | 2                      | 2,94E-04                  | SCARB1;TMEM49    |
| Vitamin E levels                                          | 5                      | 1                      | 9,85E-03                  | SCARB1           |
| Venous thromboembolism (SNP x SNP interaction)            | 11                     | 1                      | 0,02                      | TRIM71           |
| Orofacial clefts                                          | 13                     | 1                      | 0,03                      | GSDMC            |
| Celiac disease or Rheumatoid arthritis                    | 14                     | 1                      | 0,03                      | TRAF1            |
| Intraocular pressure                                      | 15                     | 1                      | 0,03                      | ICA1             |
| Alzheimer's disease                                       | 20                     | 1                      | 0,04                      | BCL3             |
| Alzheimer's disease (late onset)                          | 38                     | 1                      | 0,07                      | BCL3             |
| Vitiligo                                                  | 54                     | 1                      | 0,10                      | SLC29A3          |
| Inflammatory bowel disease                                | 341                    | 2                      | 0,15                      | RPS6KA2;SBNO2    |
| Rheumatoid arthritis                                      | 134                    | 1                      | 0,23                      | TRAF1            |
| HDL cholesterol                                           | 155                    | 1                      | 0,27                      | SCARB1           |
| Prostate cancer                                           | 279                    | 1                      | 0,43                      | PHOSPHO1         |
| Crohn's disease                                           | 300                    | 1                      | 0,45                      | SBNO2            |
| Height                                                    | 391                    | 1                      | 0,54                      | GSDMC            |
| Schizophrenia                                             | 405                    | 1                      | 0,56                      | ZEB2             |
